# Supplementary material for: Annual time-series 1-km maps of crop area and types in the conterminous US (CropAT-US): cropping diversity changes during 1850–2021
Source: Copernicus journal article supplement (doi:10.5194/essd-2023-195), 2023-09-12
Supplement: Supplementary file 1 [file essd-2023-195-supplement.pdf]

# Supplementary Information For “Annual time-series 1-km maps of crop area and types in the conterminous US (CropAT-US): cropping diversity changes during 1850-2021”

Shuchao Ye, Peiyu Cao, Chaoqun Lu

Department of Ecology, Evolution, and Organismal Biology, Iowa State University, Ames, Iowa 5011, USA

*Correspondence:* Chaoqun Lu (clu@iastate.edu)

Table S1. The reclassification of CDL. [1] and [2] are the crop type ID used in CDL and this study, respectively.

| CDL <sup>[1]</sup> | This study <sup>[2]</sup> | Crop type    |
|--------------------|---------------------------|--------------|
| 1                  | 1                         | Corn         |
| 5                  | 2                         | Soybean      |
| 24                 | 3                         | Winter wheat |
| 23                 | 4                         | Spring wheat |
| 22                 | 5                         | Durum wheat  |
| 2                  | 6                         | Cotton       |
| 4                  | 7                         | Sorghum      |
| 21                 | 8                         | Barley       |
| 3                  | 9                         | Rice         |
| Other crop types   | 10                        | Others       |

Table S2. The earliest available dates of harvesting and planting area for nine major crops at state- and county-level from USDA-NASS Quickstat.

| Crop Type    | State Harvest | State Plant | County Harvest | County Plant |
|--------------|---------------|-------------|----------------|--------------|
| Corn         | 1866          | 1919        | 1910           | 1924         |
| Soybean      | 1924          | 1924        | 1927           | 1938         |
| Winter Wheat | 1909          | 1909        | 1918           | 1919         |
| Spring Wheat | 1919          | 1919        | 1919           | 1919         |
| Durum Wheat  | 1919          | 1924        | 1926           | 1926         |
| Cotton       | 1866          | 1909        | 1919           | 1928         |
| Sorghum      | 1919          | 1924        | 1940           | 1940         |
| Rice         | 1895          | 1929        | 1938           | 1953         |
| Barley       | 1866          | 1924        | 1915           | 1924         |

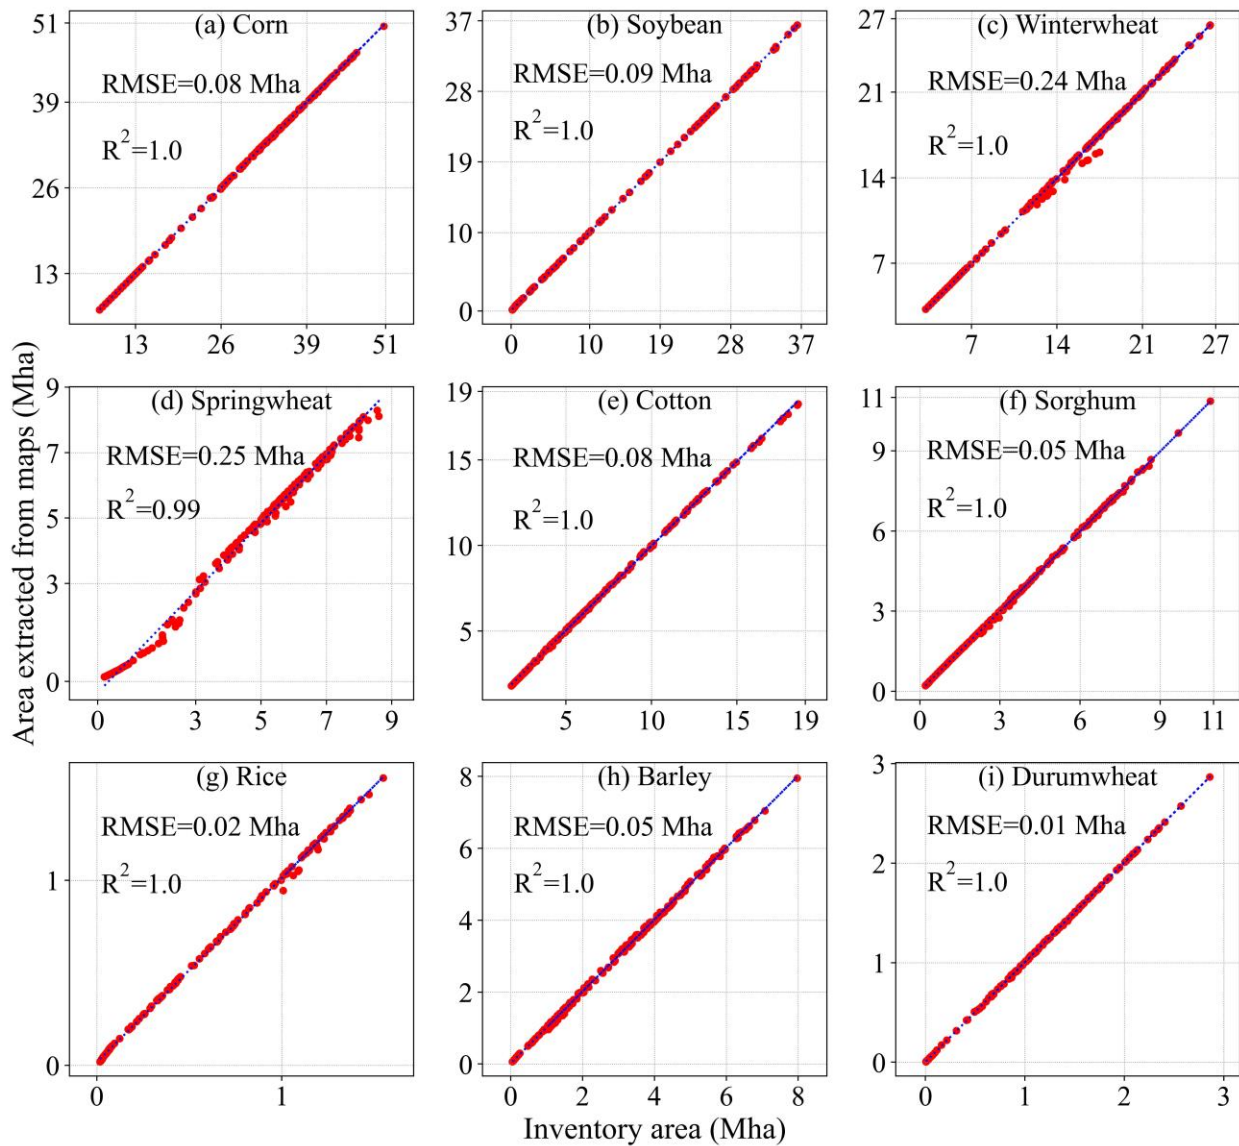

Figure S1. The crop type-specific comparison of total US crop area between the developed map and the rebuilt inventory data from 1850 to 2021 (Mha is a million hectares). The blue line is the linear regression line.

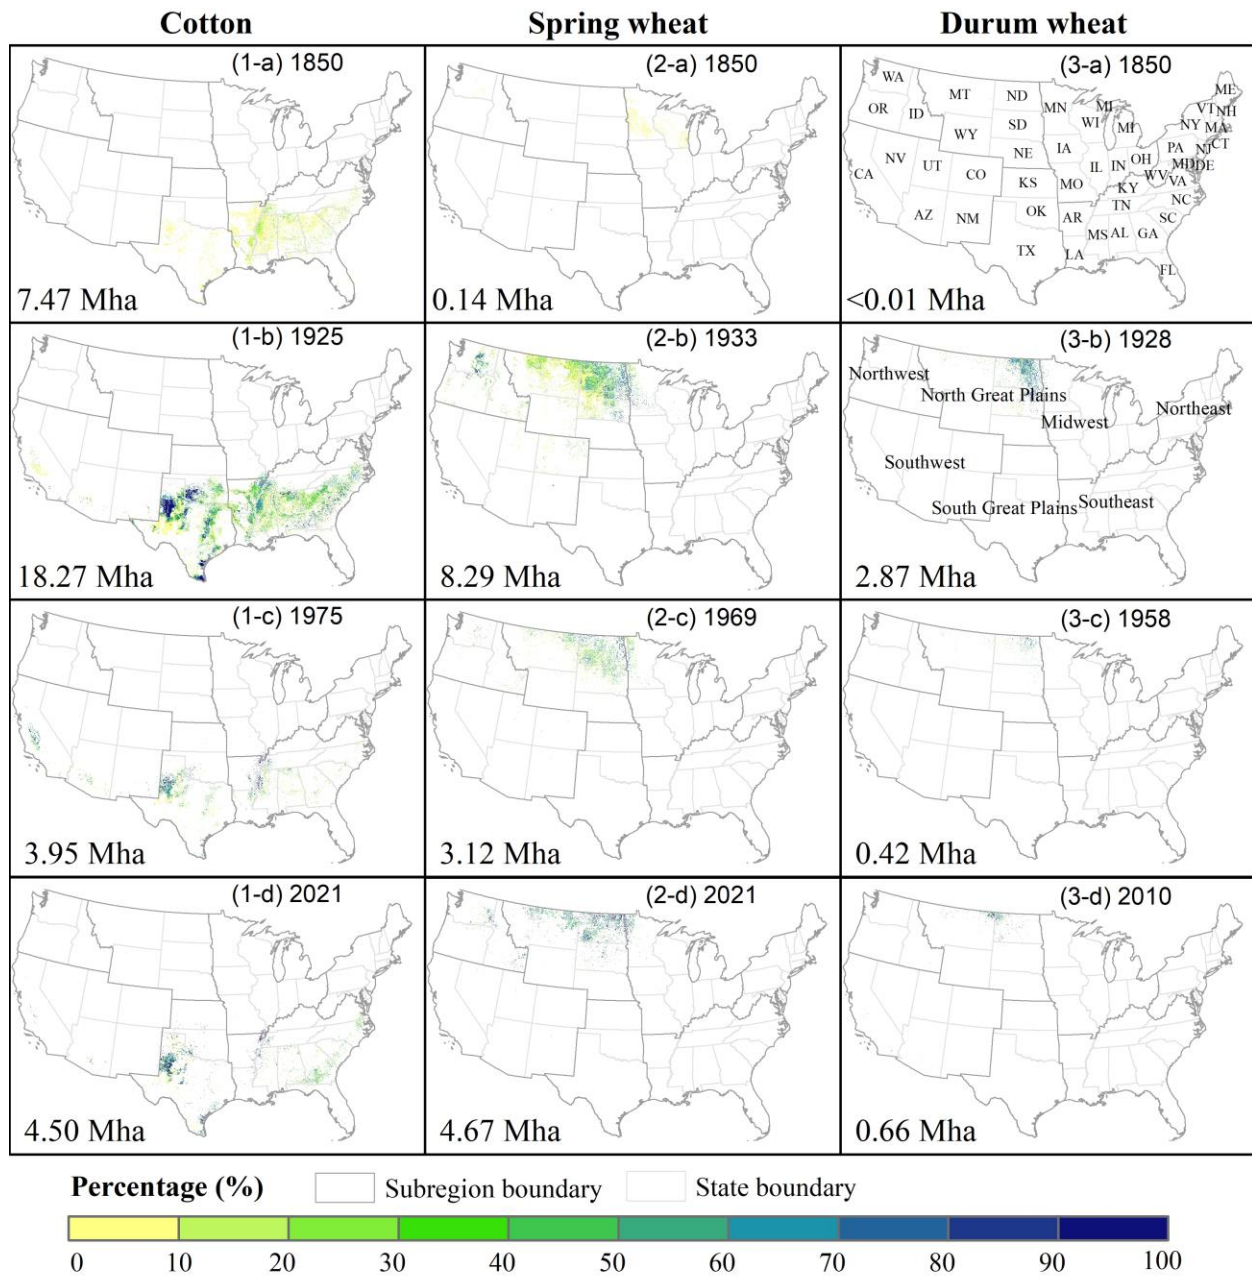

Figure S2. The spatiotemporal density pattern of cotton, spring wheat, and durum wheat at 1km by 1km resolution in the area turning years. The first, second, and third columns are the density pattern of cotton, spring wheat, and durum wheat, respectively. The total planting area for each crop type is presented at the bottom left of each subfigure. The color bar at the bottom indicates the percentage of cultivated area to the total grid area.

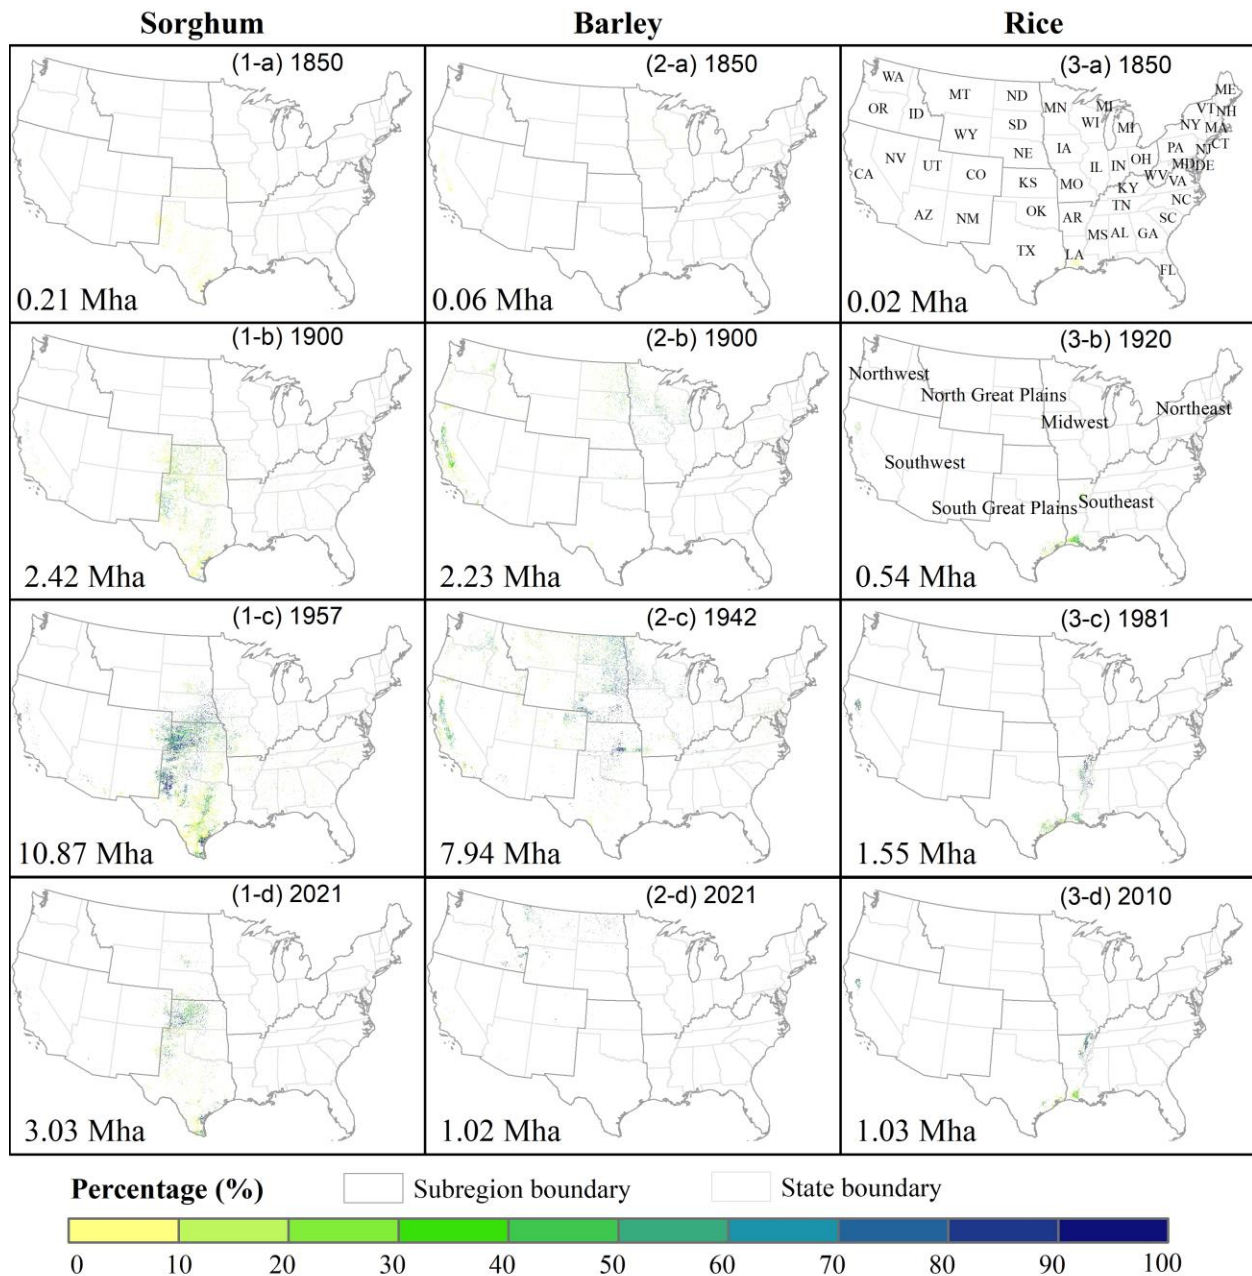

Figure S3. The spatiotemporal density pattern of sorghum, barley, and rice at 1km by 1km resolution in the area turning years. The first, second, and third columns are the density pattern of sorghum, barley, and rice, respectively. The total planting area for each crop type is presented at the bottom left of each subfigure. The color bar at the bottom indicates the percentage of cultivated area to the total grid area.

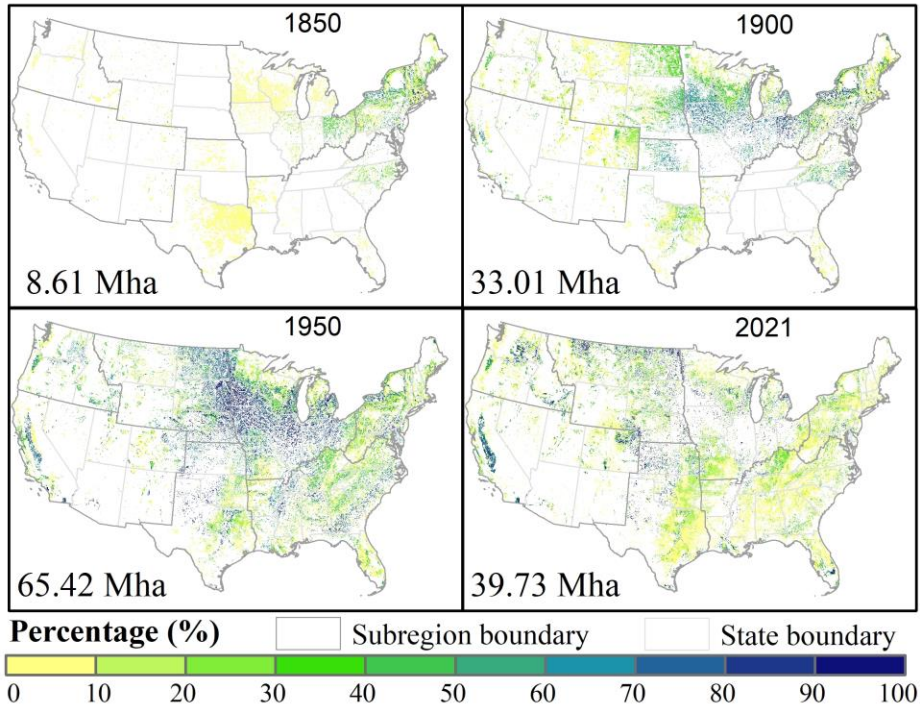

Figure S4. The spatiotemporal density patterns of "others". The color bar at the bottom indicates the percentage of cultivated area to the total grid area.

### Supplementary Methods:

Figure S5 shows that the total US cropland from LCMAP is significantly greater than that from NLCD and the inventory data due to its more extensive spatial coverage (Figure S6 (a) and (b)). By checking the product guide of LCMAP, NLCD uses a finer-grained Anderson Level II-based legend, in contrast to LCMAP's broader Level I-derived classes, where the classification of NLCD can be cross-walked to LCMAP classes (Table S3) (United States Geological Survey, 2022; Xian et al., 2022). Thus, the cropland in LCMAP refers to the pasture and cropland in NLCD, which is also confirmed by the result in Figure S5 where the sum of crop and pasture from NLCD is close to LCMAP's cropland area. Based on that, we adopted the NLCD-based trajectory method to filter the real cropland pixels from LCMAP. We first reclassified NLCD land cover maps into two classes, crop and non-crop from 2001 to 2011. Then, we used Equation S1 to stack the reclassified maps into a single in which each value, representing a trajectory, records the historical crop states (Figure S7). To retain the potential cropland distribution in LCMAP, we apply the selected non-crop trajectory (Figure S7) to exclude all grids identified as cropland in LCMAP from 1985 to 2009, where we assume that the non-crop grids in NLCD from 2001 to 2011 keep non-crop between 1985 and 2000. The filtered LCMAP is presented in Figure S6 (c) (Taking the year 2008 as a case).

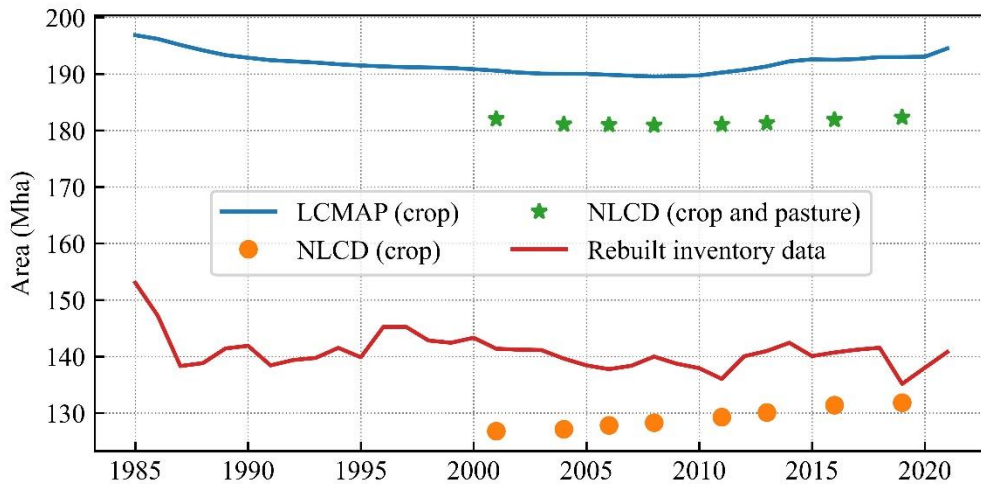

Figure S5. The total US cropland area trends extracted from the resampled LCMAP, NLCD, and the rebuilt inventory data, respectively.

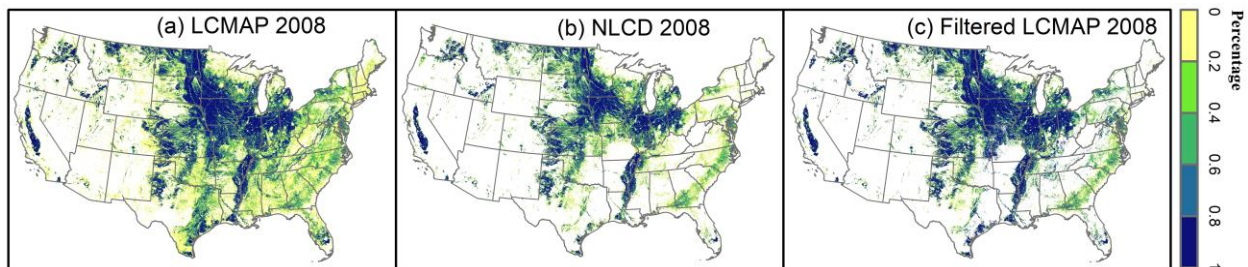

Figure S6. The distribution of the resampled LCMAP (a), NLCD (b), and filtered LCMAP (c). Taking the year 2008 as a case to show the spatial pattern.

Table S3. NLCD to LCMAP land cover translations (United States Geological Survey, 2022; Xian et al., 2022).

| NLCD Level 2 Class                                                                                            | LCMAP Level 1 Class |
|---------------------------------------------------------------------------------------------------------------|---------------------|
| Developed, Open Space<br>Developed, Low Intensity<br>Developed, Medium Intensity<br>Developed, High Intensity | Developed           |
| Pasture/Hay<br>Cultivated crops                                                                               | Cropland            |
| Dwarf Scrub<br>Shrub/Scrub<br>Grassland/Herbaceous<br>Sedge/Herbaceous<br>Lichens<br>Moss                     | Grass/Shrub         |
| Deciduous Forest<br>Evergreen Forest<br>Mixed Forest                                                          | Tree Cover          |
| Open Water                                                                                                    | Water               |
| Woody wetlands<br>Emergent Herbaceous Wetlands                                                                | Wetlands            |
| Perennial Ice/Snow                                                                                            | Ice/Snow            |
| Barren Land                                                                                                   | Barren              |

$$Croptrac = \sum_1^5(NLCD_i * 10^{5-i}), \tag{S1}$$

Where,

*Croptrac*: the crop trajectory, the meaning of which is shown in Figure S7;

*Cl<sub>i</sub>*: the reclassified NLCD map in the year from 2001 (*i* =1) to 2011 (*i* =5).

|          | 2001 | 2004 | 2006 | 2008 | 2011 |
|----------|------|------|------|------|------|
| Crop     | *    | *    | 1    | *    | *    |
| Non-crop | 0    | 0    | 0    | 0    | 0    |

Figure S7. Example of crop trajectory. 1 and 0 represent crop and non-crop, respectively. \* is either 1 or 0. Non-crop trajectory means that this pixel keeps non-crop from 2001 to 2011.

**Reference:**

United States Geological Survey: Land change monitoring, assessment, and projection (LCMAP 1.3) Science Product Guide, U.S. Geological Survey Fact Sheet, <https://doi.org/10.3133/fs20203024>, 2022.

Xian, G. Z., Smith, K., Wellington, D., Horton, J., Zhou, Q., Li, C., Auch, R., Brown, J. F., Zhu, Z., and Reker, R. R.: Implementation of the CCDC algorithm to produce the LCMAP Collection 1.0 annual land surface change product, *Earth Syst. Sci. Data*, 14, 143–162, <https://doi.org/10.5194/essd-14-143-2022>, 2022.
